# Supplementary material
Source: PubMed Central journal article supplement (PMC240653)

### C-libraries photolysis chart

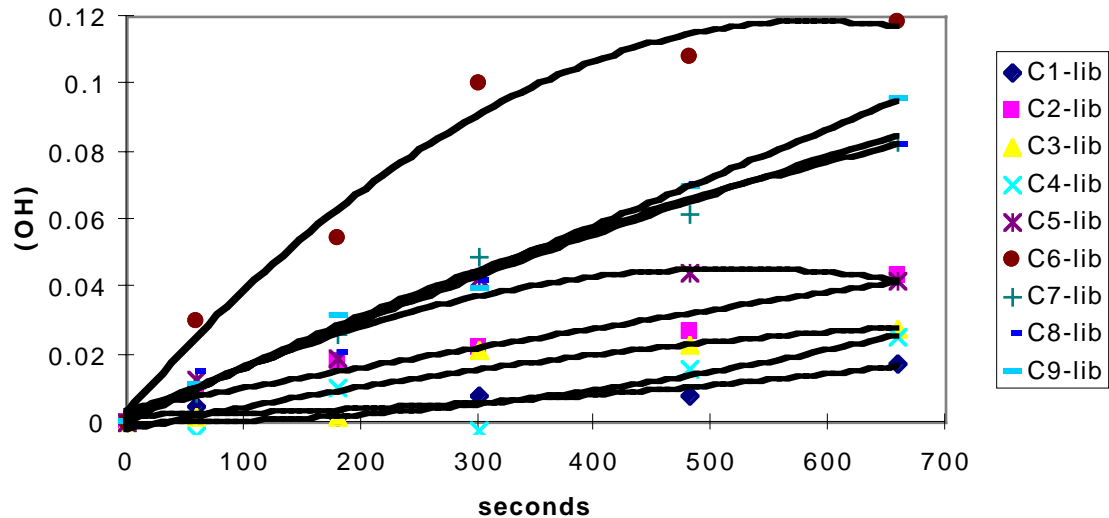

Supplement: pnas_100_22_12548__10.pdf [file pnas_100_22_12548__10.pdf]

### C1-C2-C3 comparison

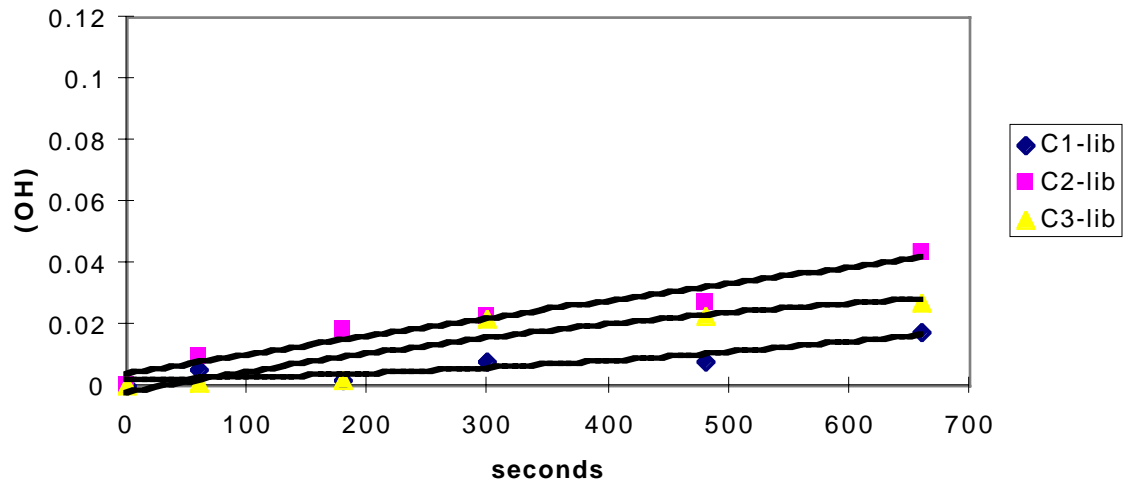

Supplement: pnas_100_22_12548__12.pdf [file pnas_100_22_12548__12.pdf]

### C4-C5-C6 comparison

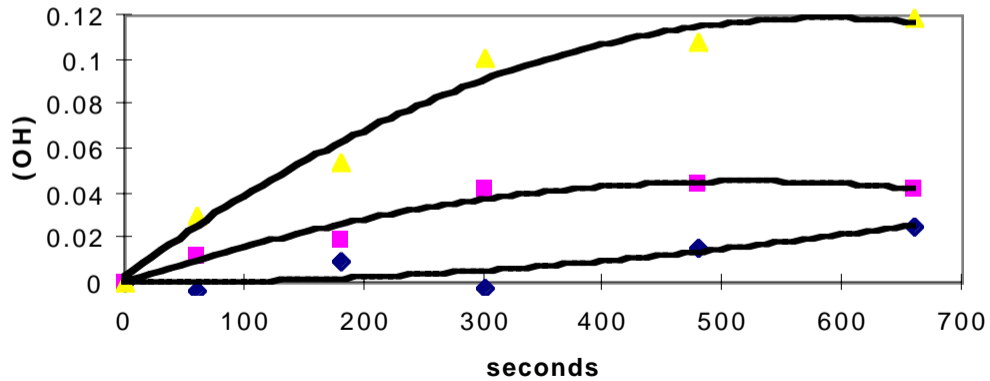

Supplement: pnas_100_22_12548__14.pdf [file pnas_100_22_12548__14.pdf]

### C7-C8-C9 comparison

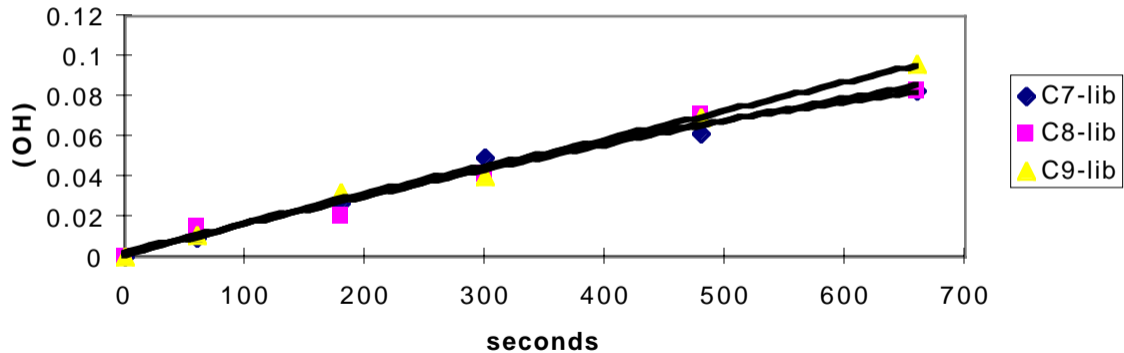

Supplement: pnas_100_22_12548__16.pdf [file pnas_100_22_12548__16.pdf]

### C1-C4-C7 comparison

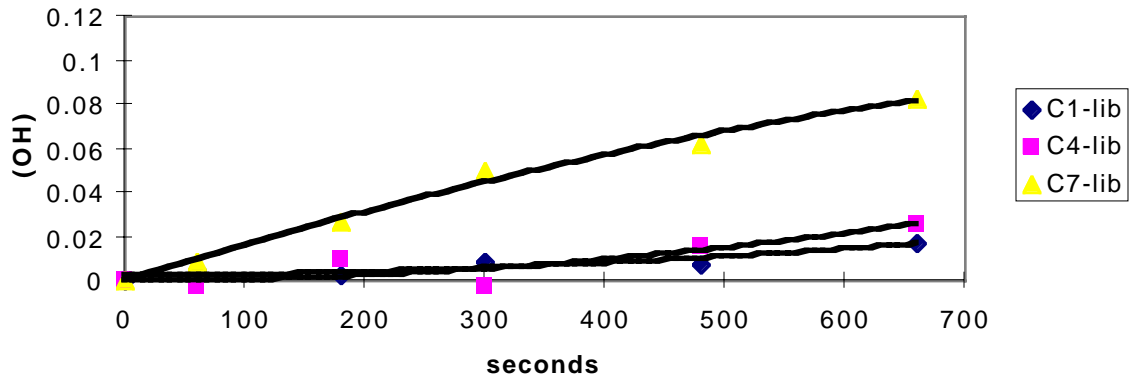

Supplement: pnas_100_22_12548__18.pdf [file pnas_100_22_12548__18.pdf]

## C2-C5-C8 comparison

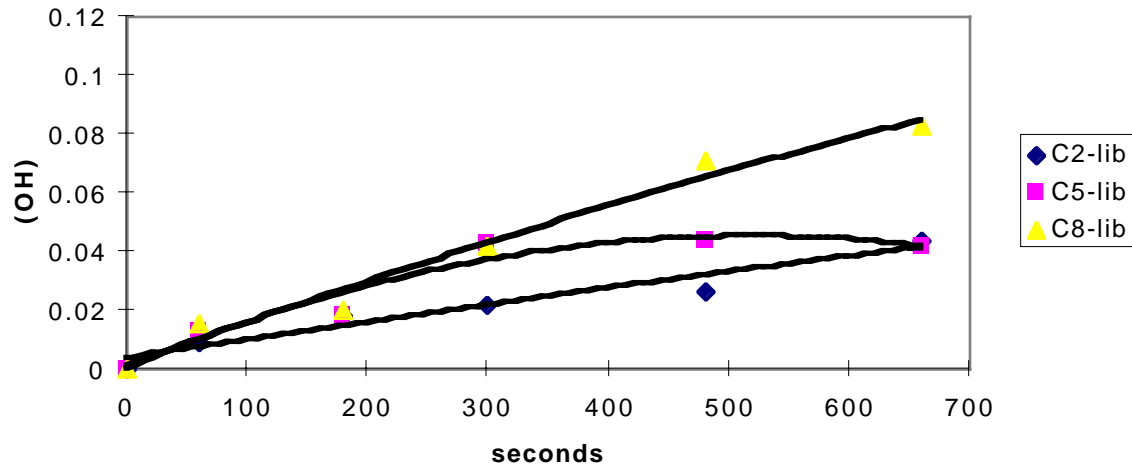

Supplement: pnas_100_22_12548__20.pdf [file pnas_100_22_12548__20.pdf]

### C3-C6-C9 comparison

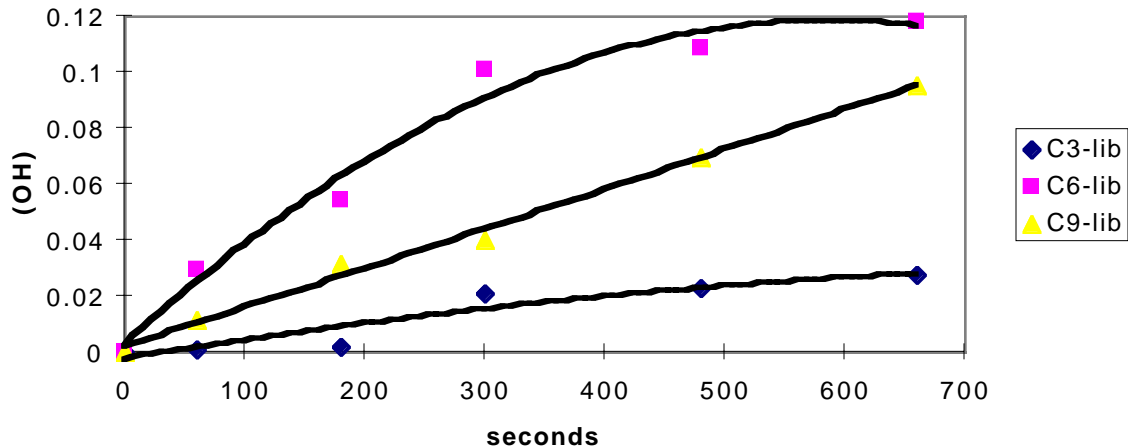

Supplement: pnas_100_22_12548__22.pdf [file pnas_100_22_12548__22.pdf]

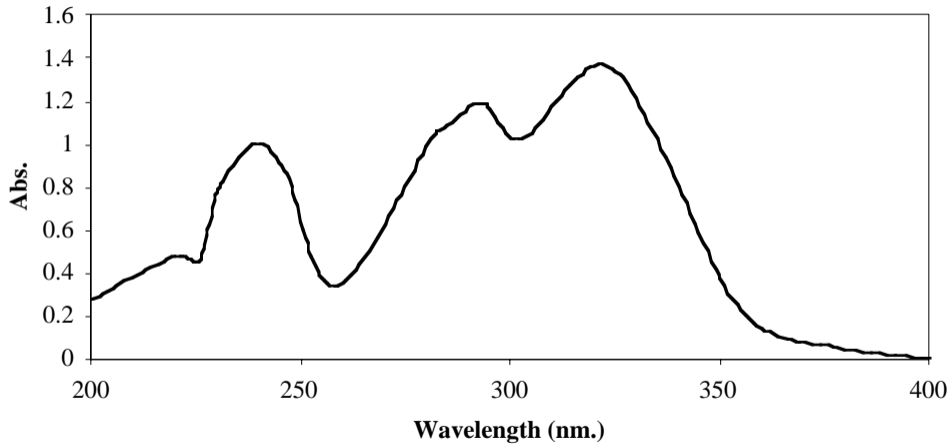

Supplement: pnas_100_22_12548__24.pdf [file pnas_100_22_12548__24.pdf]

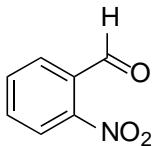

**1**

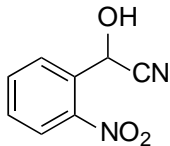

**2**

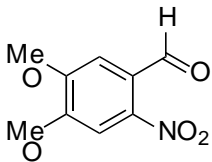

**3**

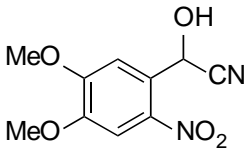

**4**

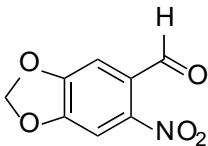

**5**

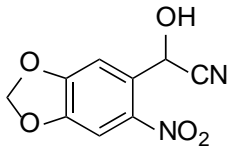

**6**

Supplement: pnas_100_22_12548__3.pdf [file pnas_100_22_12548__3.pdf]

# A-libraries photolysis chart

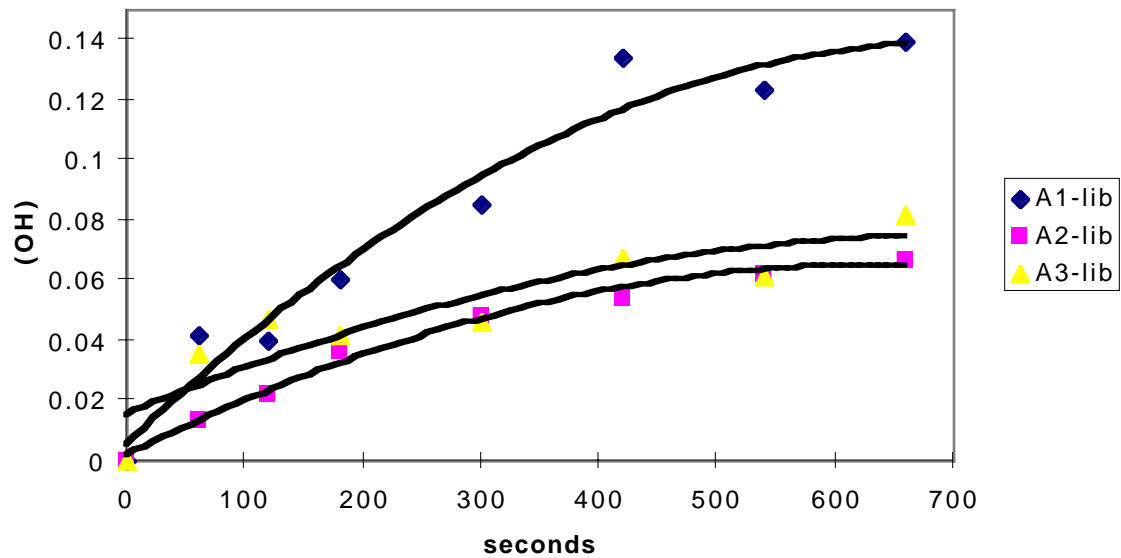

Supplement: pnas_100_22_12548__6.pdf [file pnas_100_22_12548__6.pdf]

## B-libraries photolysis chart

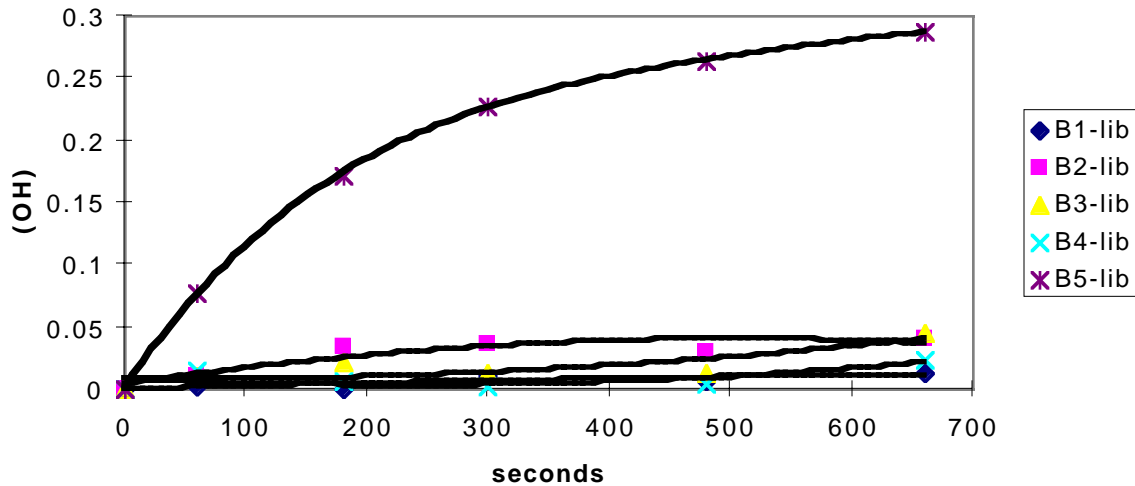

Supplement: pnas_100_22_12548__8.pdf [file pnas_100_22_12548__8.pdf]
